# Supplementary material for: Effects of Frequency Filtering on Intensity and Noise in Accelerometer-Based Physical Activity Measurements
Source: PubMed Central journal article supplement (PMC6539652; doi:10.3390/s19092186), 2019-05-11
Supplement: sensors-19-02186-s001.pdf [file sensors-19-02186-s001.pdf]

A, 1 s

**Children**

|           |            |       |          |          |            |       |
|-----------|------------|-------|----------|----------|------------|-------|
| ActiGraph | Sed        | 97.4% | 2.6%     | 0.0%     | 0.0%       |       |
|           | Light      | 15.7% | 80.3%    | 4.0%     | 0.0%       | 0.0%  |
|           | Moderate   | 0.0%  | 42.0%    | 57.6%    | 0.4%       | 0.0%  |
|           | Vigorous   |       | 0.3%     | 92.2%    | 6.5%       | 0.9%  |
|           | V-vigorous |       | 0.0%     | 60.9%    | 27.1%      | 12.0% |
|           | Sed        | Light | Moderate | Vigorous | V-vigorous |       |

4 Hz

**Adults**

|           |            |       |          |          |            |      |
|-----------|------------|-------|----------|----------|------------|------|
| ActiGraph | Sed        | 96.3% | 3.7%     | 0.1%     | 0.0%       |      |
|           | Light      | 5.9%  | 85.0%    | 9.1%     | 0.0%       |      |
|           | Moderate   | 0.0%  | 20.2%    | 79.0%    | 0.8%       | 0.0% |
|           | Vigorous   |       | 0.0%     | 89.4%    | 9.0%       | 1.6% |
|           | V-vigorous |       | 0.0%     | 64.1%    | 30.8%      | 5.1% |
|           | Sed        | Light | Moderate | Vigorous | V-vigorous |      |

4 Hz

|           |            |       |          |          |            |       |
|-----------|------------|-------|----------|----------|------------|-------|
| ActiGraph | Sed        | 97.8% | 2.2%     | 0.0%     | 0.0%       | 0.0%  |
|           | Light      | 26.5% | 70.9%    | 2.6%     | 0.0%       | 0.0%  |
|           | Moderate   | 0.3%  | 58.6%    | 40.6%    | 0.5%       | 0.1%  |
|           | Vigorous   |       | 9.0%     | 83.3%    | 5.7%       | 2.0%  |
|           | V-vigorous |       | 0.2%     | 69.8%    | 20.0%      | 10.0% |
|           | Sed        | Light | Moderate | Vigorous | V-vigorous |       |

10 Hz

|           |            |       |          |          |            |      |
|-----------|------------|-------|----------|----------|------------|------|
| ActiGraph | Sed        | 96.5% | 3.4%     | 0.0%     | 0.0%       | 0.0% |
|           | Light      | 10.9% | 80.8%    | 8.3%     | 0.0%       | 0.0% |
|           | Moderate   | 0.0%  | 31.3%    | 67.8%    | 0.8%       | 0.1% |
|           | Vigorous   |       | 0.1%     | 89.5%    | 7.9%       | 2.6% |
|           | V-vigorous |       | 0.0%     | 72.8%    | 22.0%      | 5.2% |
|           | Sed        | Light | Moderate | Vigorous | V-vigorous |      |

10 Hz

|           |            |       |          |          |            |      |
|-----------|------------|-------|----------|----------|------------|------|
| ActiGraph | Sed        | 97.9% | 2.0%     | 0.0%     | 0.0%       | 0.0% |
|           | Light      | 44.4% | 52.7%    | 2.9%     | 0.0%       | 0.0% |
|           | Moderate   | 7.8%  | 60.5%    | 31.3%    | 0.4%       | 0.1% |
|           | Vigorous   | 0.3%  | 31.4%    | 61.3%    | 5.3%       | 1.8% |
|           | V-vigorous | 0.0%  | 9.9%     | 65.9%    | 16.1%      | 8.2% |
|           | Sed        | Light | Moderate | Vigorous | V-vigorous |      |

High-Pass

|           |            |       |          |          |            |      |
|-----------|------------|-------|----------|----------|------------|------|
| ActiGraph | Sed        | 96.6% | 3.3%     | 0.1%     | 0.0%       | 0.0% |
|           | Light      | 25.1% | 66.2%    | 8.8%     | 0.0%       | 0.0% |
|           | Moderate   | 1.9%  | 35.7%    | 61.6%    | 0.8%       | 0.1% |
|           | Vigorous   | 0.1%  | 19.3%    | 70.4%    | 7.7%       | 2.5% |
|           | V-vigorous |       | 4.7%     | 74.1%    | 16.6%      | 4.6% |
|           | Sed        | Light | Moderate | Vigorous | V-vigorous |      |

High-Pass

B, 10 s

**Children**

|           |            |       |       |          |          |            |
|-----------|------------|-------|-------|----------|----------|------------|
| ActiGraph | Sed        | 99.7% | 0.3%  | 0.0%     |          |            |
|           | Light      | 19.4% | 80.2% | 0.3%     | 0.0%     |            |
|           | Moderate   |       | 44.2% | 55.7%    | 0.1%     | 0.0%       |
|           | Vigorous   |       |       | 91.5%    | 8.2%     | 0.3%       |
|           | V-vigorous |       |       | 62.1%    | 28.7%    | 9.2%       |
|           |            | Sed   | Light | Moderate | Vigorous | V-vigorous |

4 Hz

**Adults**

|           |            |       |       |          |          |            |
|-----------|------------|-------|-------|----------|----------|------------|
| ActiGraph | Sed        | 98.0% | 2.0%  | 0.0%     |          |            |
|           | Light      | 3.5%  | 92.9% | 3.6%     |          |            |
|           | Moderate   |       | 16.0% | 83.0%    | 0.9%     | 0.0%       |
|           | Vigorous   |       |       | 79.6%    | 18.0%    | 2.4%       |
|           | V-vigorous |       |       | 58.1%    | 34.1%    | 7.8%       |
|           |            | Sed   | Light | Moderate | Vigorous | V-vigorous |

4 Hz

|           |            |       |       |          |          |            |
|-----------|------------|-------|-------|----------|----------|------------|
| ActiGraph | Sed        | 99.6% | 0.3%  | 0.0%     | 0.0%     |            |
|           | Light      | 34.3% | 65.3% | 0.4%     | 0.0%     | 0.0%       |
|           | Moderate   |       | 61.4% | 38.4%    | 0.2%     | 0.0%       |
|           | Vigorous   |       | 0.2%  | 90.4%    | 8.5%     | 0.9%       |
|           | V-vigorous |       |       | 69.0%    | 22.4%    | 8.6%       |
|           |            | Sed   | Light | Moderate | Vigorous | V-vigorous |

10 Hz

|           |            |       |       |          |          |            |
|-----------|------------|-------|-------|----------|----------|------------|
| ActiGraph | Sed        | 98.4% | 1.6%  | 0.0%     |          |            |
|           | Light      | 9.8%  | 87.1% | 3.1%     | 0.0%     |            |
|           | Moderate   |       | 27.5% | 71.4%    | 0.9%     | 0.1%       |
|           | Vigorous   |       |       | 80.8%    | 15.1%    | 4.2%       |
|           | V-vigorous |       |       | 65.6%    | 27.1%    | 7.3%       |
|           |            | Sed   | Light | Moderate | Vigorous | V-vigorous |

10 Hz

|           |            |       |       |          |          |            |
|-----------|------------|-------|-------|----------|----------|------------|
| ActiGraph | Sed        | 99.7% | 0.3%  | 0.0%     |          |            |
|           | Light      | 49.8% | 49.9% | 0.4%     | 0.0%     | 0.0%       |
|           | Moderate   | 0.4%  | 70.4% | 29.0%    | 0.2%     | 0.0%       |
|           | Vigorous   | 0.0%  | 10.7% | 80.8%    | 7.7%     | 0.9%       |
|           | V-vigorous |       | 0.5%  | 72.5%    | 19.8%    | 7.1%       |
|           |            | Sed   | Light | Moderate | Vigorous | V-vigorous |

High-Pass

|           |            |       |       |          |          |            |
|-----------|------------|-------|-------|----------|----------|------------|
| ActiGraph | Sed        | 98.3% | 1.7%  | 0.0%     |          |            |
|           | Light      | 16.9% | 79.5% | 3.6%     | 0.0%     |            |
|           | Moderate   | 0.0%  | 30.5% | 68.5%    | 0.9%     | 0.1%       |
|           | Vigorous   |       | 0.1%  | 80.5%    | 15.3%    | 4.1%       |
|           | V-vigorous |       |       | 68.3%    | 24.9%    | 6.7%       |
|           |            | Sed   | Light | Moderate | Vigorous | V-vigorous |

High-Pass

C, 60 s

**Children**

|           |            |       |       |          |          |            |
|-----------|------------|-------|-------|----------|----------|------------|
| ActiGraph | Sed        | 99.9% | 0.1%  |          |          |            |
|           | Light      | 21.5% | 78.3% | 0.1%     |          |            |
|           | Moderate   |       | 45.5% | 54.5%    | 0.0%     |            |
|           | Vigorous   |       |       | 95.6%    | 4.4%     | 0.1%       |
|           | V-vigorous |       |       | 66.0%    | 26.7%    | 7.3%       |
|           |            | Sed   | Light | Moderate | Vigorous | V-vigorous |

4 Hz

**Adults**

|           |            |       |       |          |          |            |
|-----------|------------|-------|-------|----------|----------|------------|
| ActiGraph | Sed        | 97.6% | 2.4%  | 0.0%     |          |            |
|           | Light      | 2.0%  | 95.6% | 2.3%     |          |            |
|           | Moderate   |       | 12.8% | 85.8%    | 1.4%     | 0.0%       |
|           | Vigorous   |       |       | 57.3%    | 39.5%    | 3.1%       |
|           | V-vigorous |       |       | 24.8%    | 51.4%    | 23.7%      |
|           |            | Sed   | Light | Moderate | Vigorous | V-vigorous |

4 Hz

|           |            |       |       |          |          |            |
|-----------|------------|-------|-------|----------|----------|------------|
| ActiGraph | Sed        | 99.9% | 0.1%  | 0.0%     |          |            |
|           | Light      | 36.3% | 63.6% | 0.2%     | 0.0%     |            |
|           | Moderate   |       | 60.4% | 39.5%    | 0.0%     |            |
|           | Vigorous   |       | 0.1%  | 94.2%    | 5.5%     | 0.1%       |
|           | V-vigorous |       |       | 75.4%    | 19.8%    | 4.8%       |
|           |            | Sed   | Light | Moderate | Vigorous | V-vigorous |

10 Hz

|           |            |       |       |          |          |            |
|-----------|------------|-------|-------|----------|----------|------------|
| ActiGraph | Sed        | 98.3% | 1.7%  | 0.0%     |          |            |
|           | Light      | 7.9%  | 90.4% | 1.7%     | 0.0%     |            |
|           | Moderate   |       | 22.9% | 75.4%    | 1.5%     | 0.1%       |
|           | Vigorous   |       |       | 59.6%    | 34.0%    | 6.3%       |
|           | V-vigorous |       |       | 28.0%    | 49.7%    | 22.2%      |
|           |            | Sed   | Light | Moderate | Vigorous | V-vigorous |

10 Hz

|           |            |       |       |          |          |            |
|-----------|------------|-------|-------|----------|----------|------------|
| ActiGraph | Sed        | 99.9% | 0.1%  | 0.0%     |          |            |
|           | Light      | 47.3% | 52.6% | 0.1%     | 0.0%     |            |
|           | Moderate   | 0.0%  | 68.5% | 31.4%    | 0.0%     | 0.0%       |
|           | Vigorous   |       | 3.6%  | 91.3%    | 5.0%     | 0.1%       |
|           | V-vigorous |       |       | 79.3%    | 17.8%    | 2.9%       |
|           |            | Sed   | Light | Moderate | Vigorous | V-vigorous |

High-Pass

|           |            |       |       |          |          |            |
|-----------|------------|-------|-------|----------|----------|------------|
| ActiGraph | Sed        | 98.0% | 2.0%  | 0.0%     |          |            |
|           | Light      | 11.6% | 86.4% | 2.0%     | 0.0%     |            |
|           | Moderate   | 0.0%  | 23.6% | 74.8%    | 1.5%     | 0.1%       |
|           | Vigorous   |       |       | 61.2%    | 32.2%    | 6.6%       |
|           | V-vigorous |       |       | 28.4%    | 50.9%    | 20.7%      |
|           |            | Sed   | Light | Moderate | Vigorous | V-vigorous |

High-Pass
